# Supplementary material for: Direct Population of Triplet States for Efficient Organic Afterglow through the Intra/Intermolecular Heavy-Atom Effect
Source: MDPI journal article supplement (doi:10.3390/molecules29051014), 2024-02-26
Supplement: s1 [file s1]

## Electronic Supporting Information (ESI)

# Direct Population of Triplet States for Efficient Organic Afterglow through the Intra/Intermolecular Heavy-Atom Effect

Jie Yuan <sup>1,2</sup>, Yongrong Wang <sup>2</sup>, Binbin Zhou <sup>1</sup>, Wenjing Xie <sup>1</sup>, Botao Zheng <sup>2</sup>, Jingyu Zhang <sup>2</sup>, Ping Li <sup>2</sup>, Tian Yu <sup>1</sup>, Yuanyuan Qi <sup>2</sup>, Ye Tao <sup>2,\*</sup> and Runfeng Chen <sup>2,\*</sup>

<sup>1</sup> Engineering Technology Training Center, Nanjing Vocational University of Industry Technology, 1 Yangshan North Road, Nanjing 210023, China; shuipingyuanjie@niit.edu.cn (J.Y.); 2020101101@niit.edu.cn (B.Z.); WhitneyXie8894@outlook.com (W.X.); 2015100812@niit.edu.cn (T.Y.)

<sup>2</sup> State Key Laboratory of Organic Electronics and Information Displays & Institute of Advanced Materials (IAM), Nanjing University of Posts & Telecommunications, 9 Wenyuan Road, Nanjing 210023, China; iamyrwang@163.com (Y.W.); 15934162709@163.com (B.Z.); sxxzyzjy@126.com (J.Z.); iampingli@njupt.edu.cn (P.L.); iamyyqi@njupt.edu.cn (Y.Q.)

\* Correspondence: iamytiao@njupt.edu.cn (Y.T.); iamrfchen@njupt.edu.cn (R.C.)

## Table of Contents

|                                                                      |    |
|----------------------------------------------------------------------|----|
| Synthesis and characterization .....                                 | 2  |
| Single crystal X-ray analysis .....                                  | 6  |
| Photophysical property investigations .....                          | 9  |
| Probing the formation of triplet excited states .....                | 18 |
| Time-dependent density functional theory (TD-DFT) calculations ..... | 19 |



## Synthesis and characterization

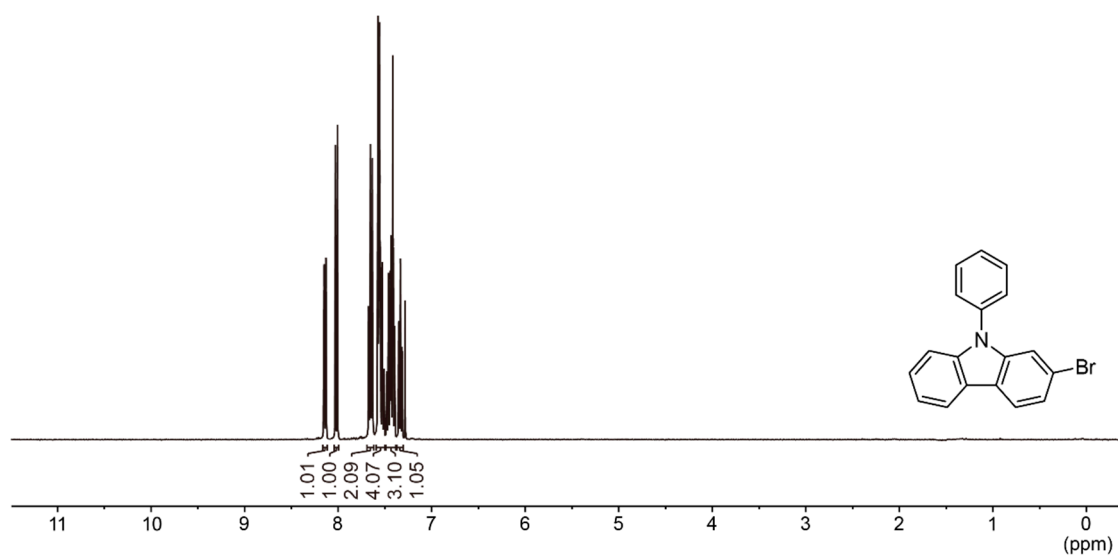

**Figure S1.**  $^1\text{H}$  NMR spectrum of PC2Br.

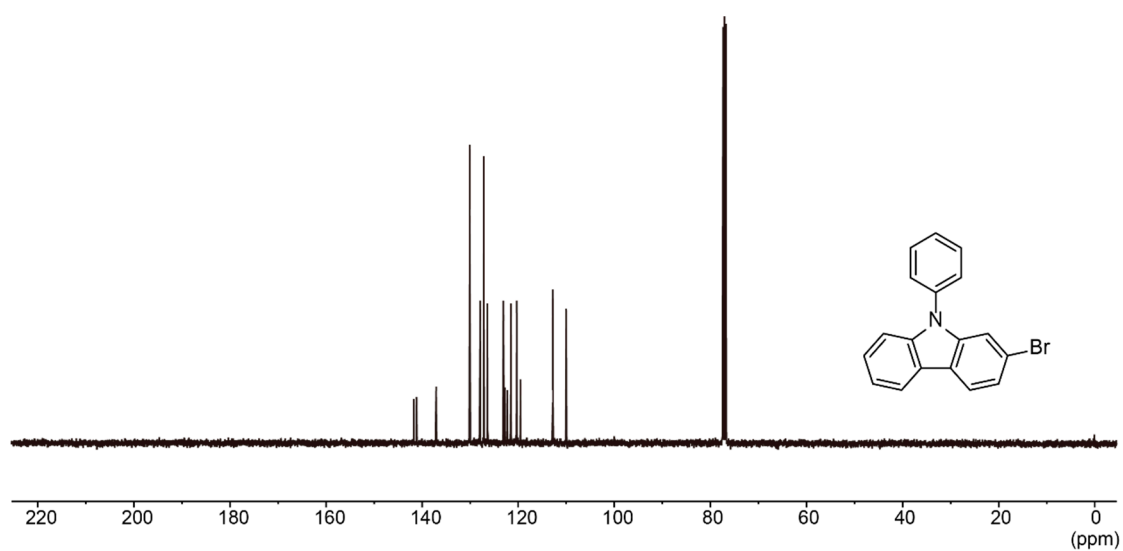

**Figure S2.**  $^{13}\text{C}$  NMR spectrum of PC2Br.



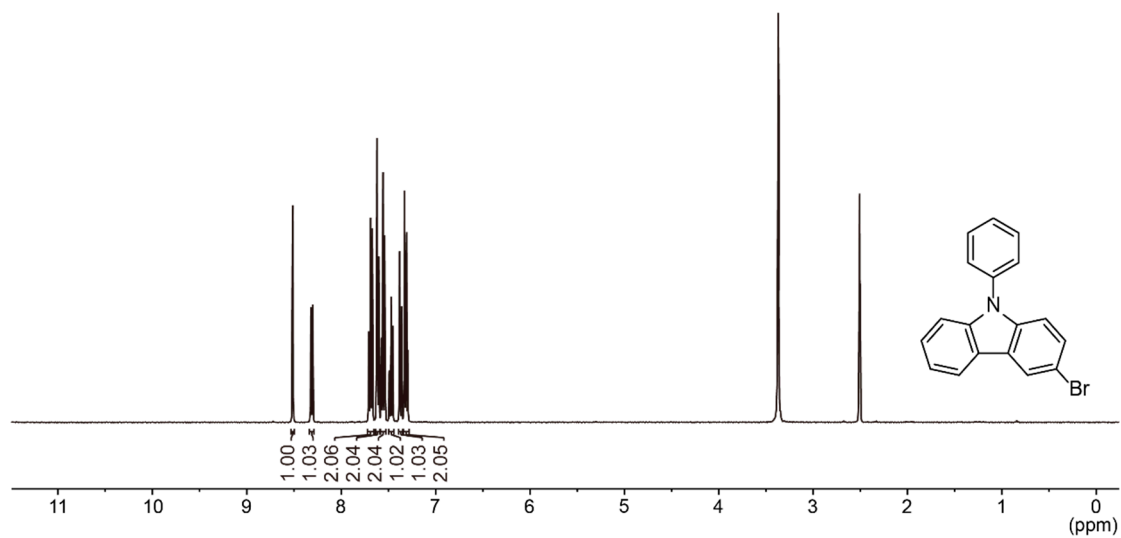

**Figure S3.**  $^1\text{H}$  NMR spectrum of PC3Br.

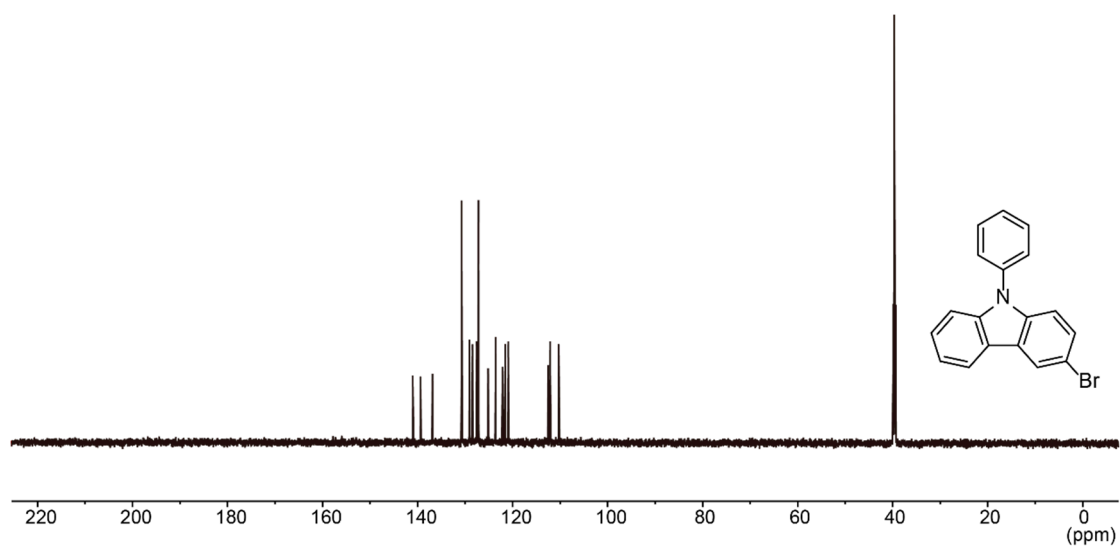

**Figure S4.**  $^{13}\text{C}$  NMR spectrum of PC3Br.



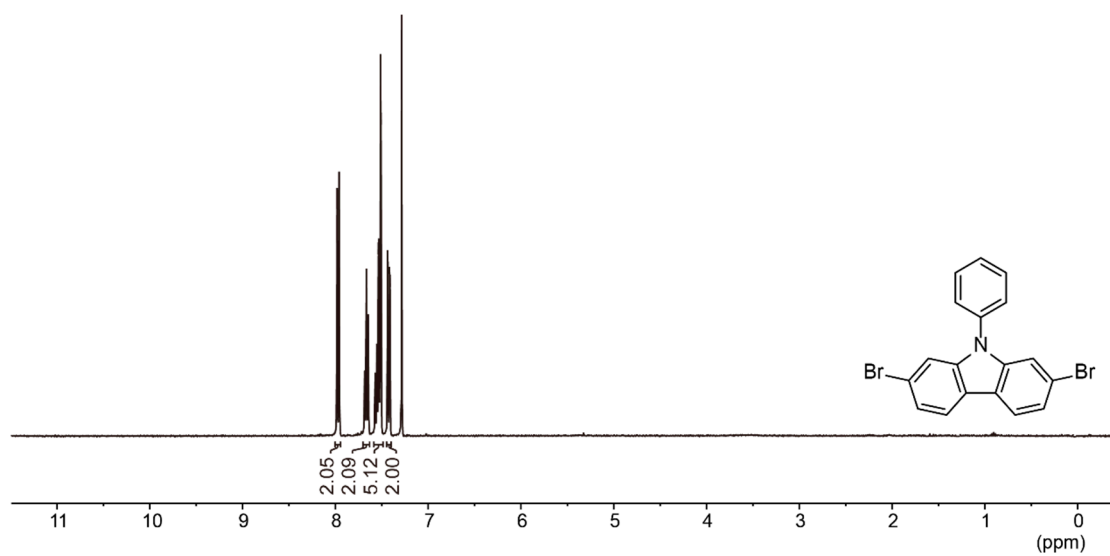

**Figure S5.** <sup>1</sup>H NMR spectrum of PC27DBr.

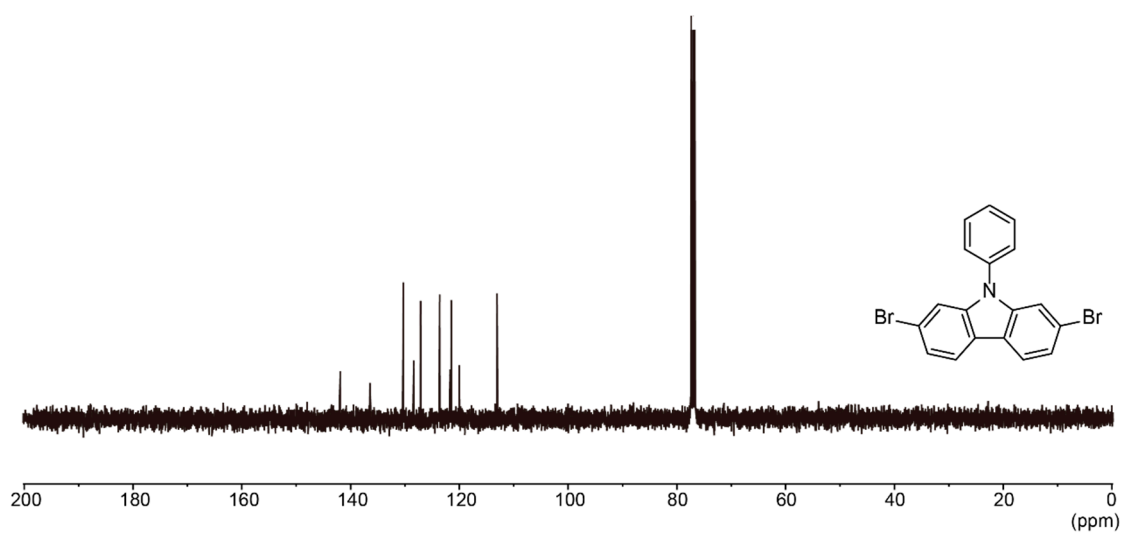

**Figure S6.** <sup>13</sup>C NMR spectrum of PC27DBr.



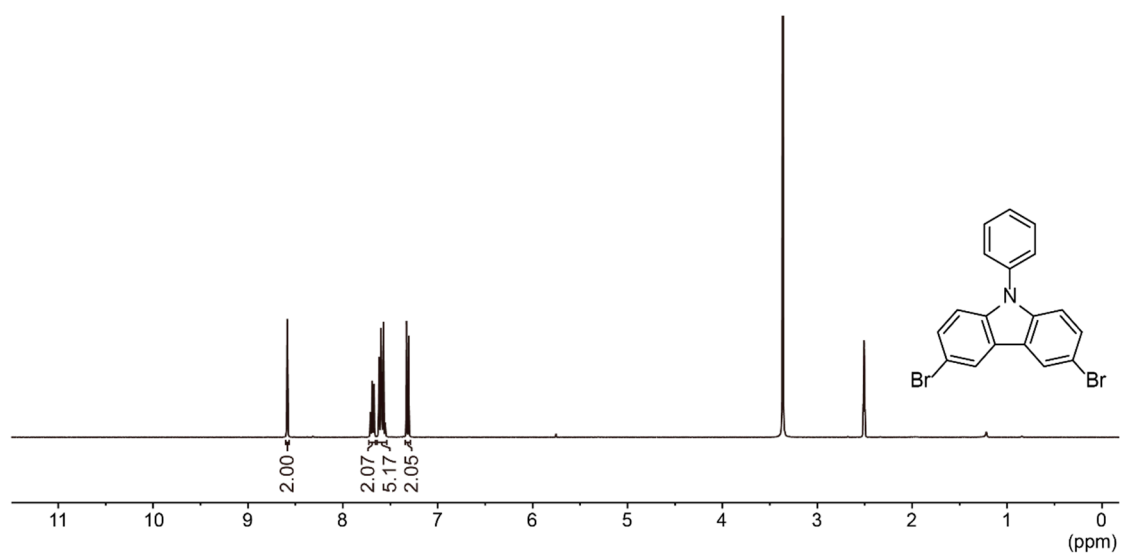

**Figure S7.**  $^1\text{H}$  NMR spectrum of PC36DBr.

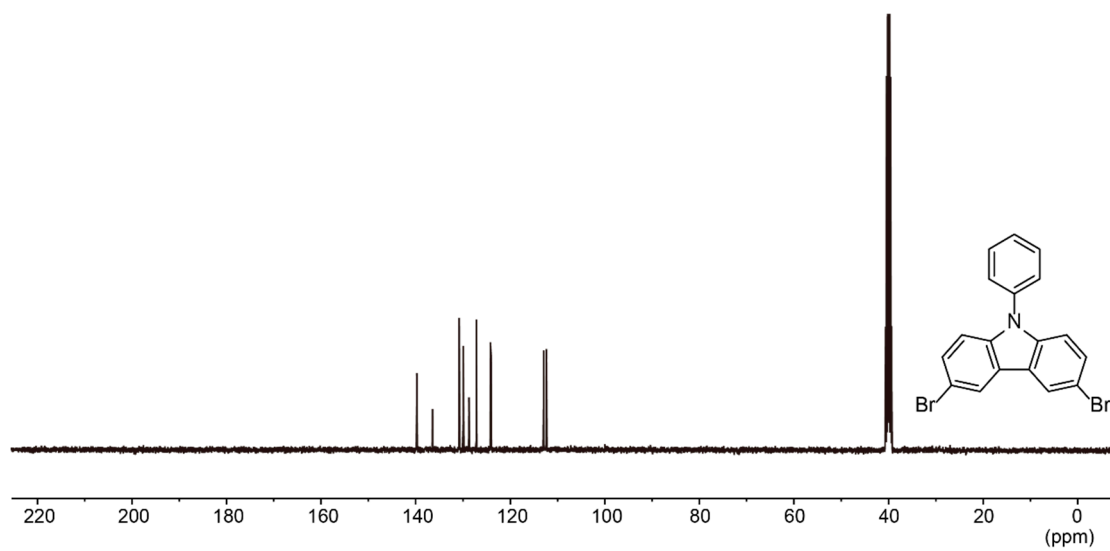

**Figure S8.**  $^{13}\text{C}$  NMR spectrum of PC36DBr.



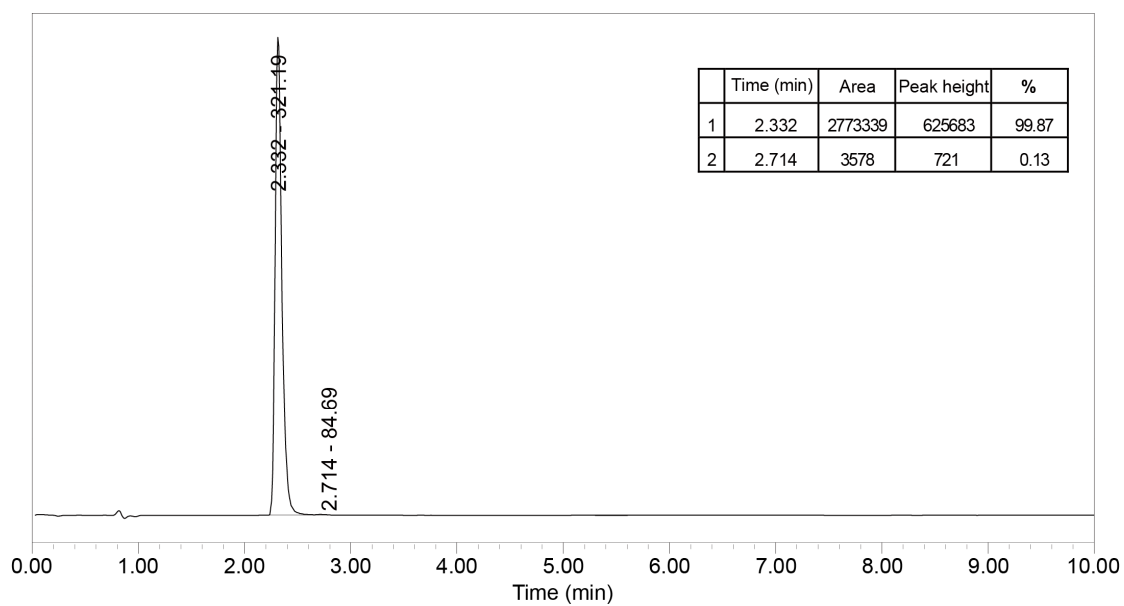

**Figure S9.** Liquid chromatographs of **PC2Br** after the recrystallization.

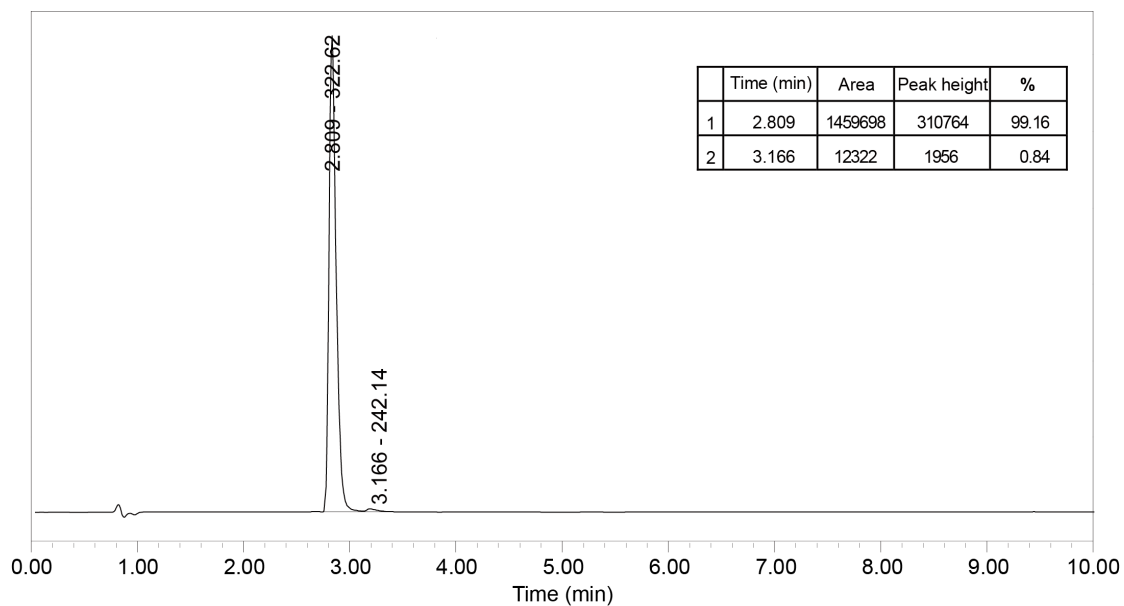

**Figure S10.** Liquid chromatographs of **PC3Br** after the recrystallization.



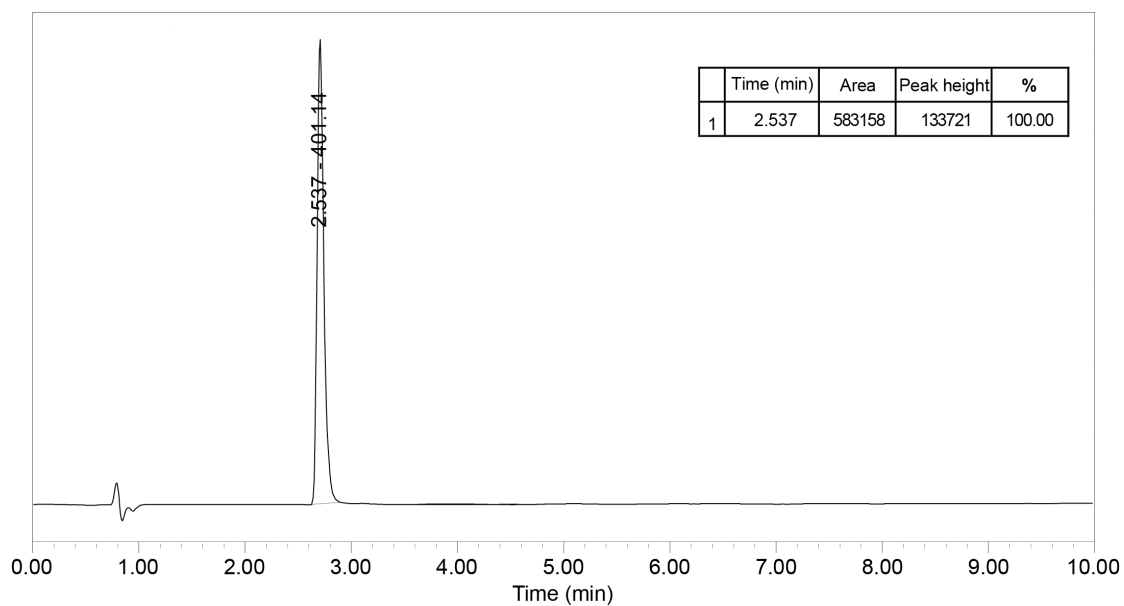

**Figure S11.** Liquid chromatographs of **PC27DBr** after the recrystallization.

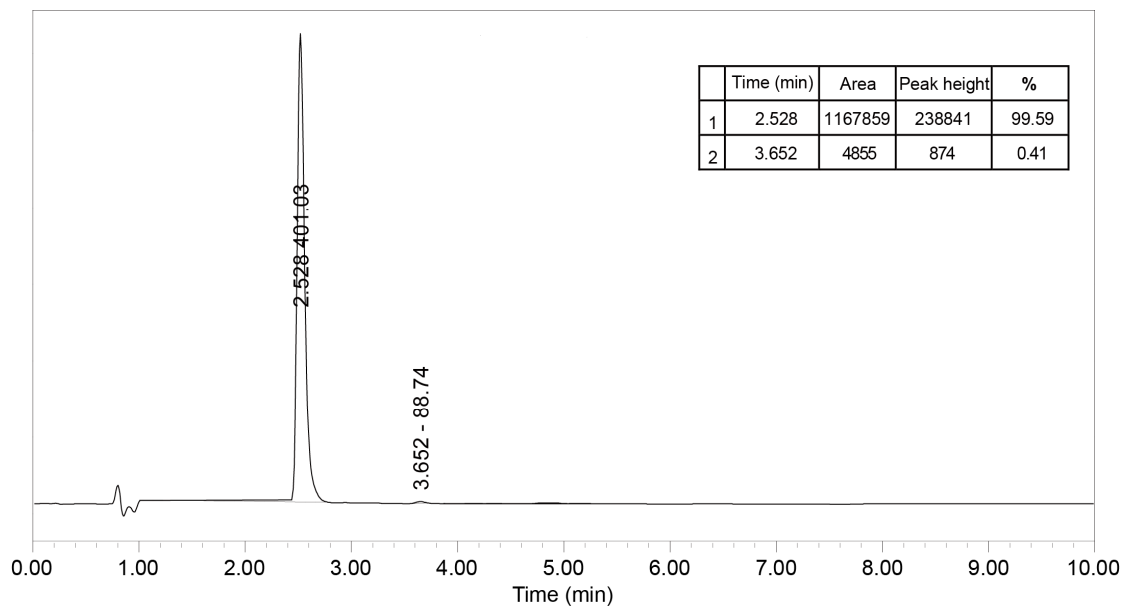

**Figure S12.** Liquid chromatographs of **PC36DBr** after the recrystallization.



## Single crystal X-ray analysis

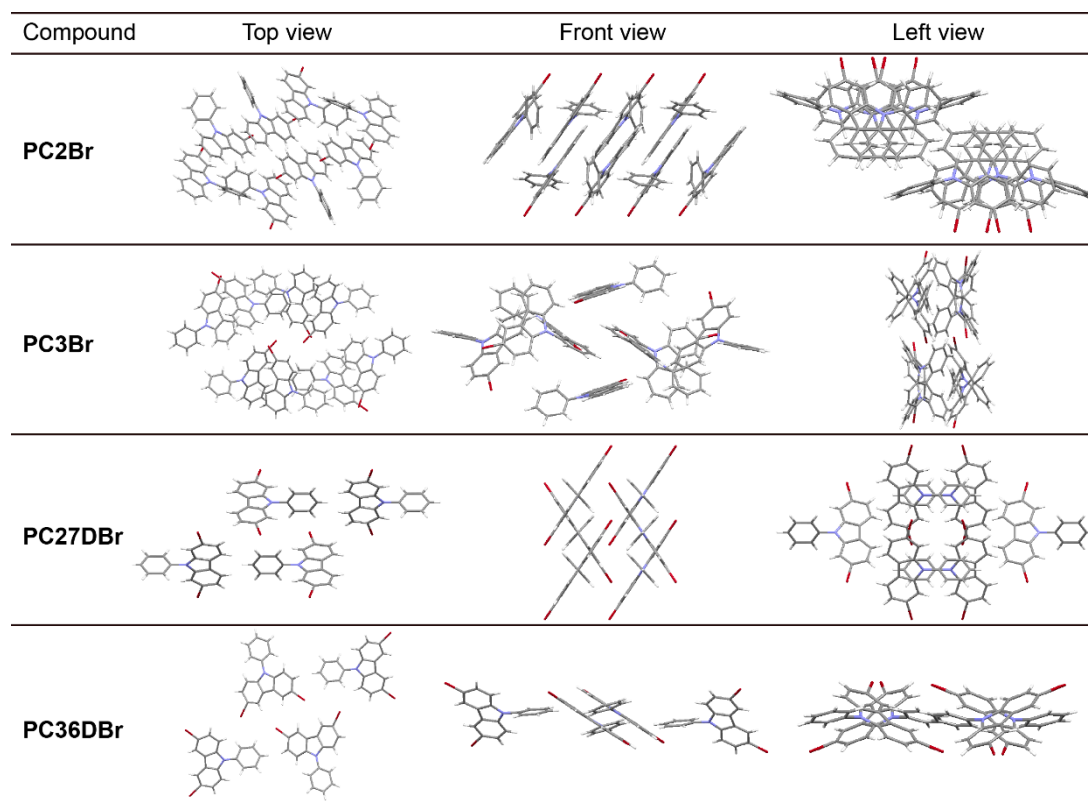

**Figure S13.** Single-crystal structures of **PC2Br**, **PC3Br**, **PC27DBr** and **PC36DBr**.

**Table S1.** Structure data of **PC2Br**, **PC3Br**, **PC27DBr** and **PC36DBr** single crystals.

| Compound                                                                    | PC2Br                               | PC3Br                               | PC27DBr                                          | PC36DBr                                          |
|-----------------------------------------------------------------------------|-------------------------------------|-------------------------------------|--------------------------------------------------|--------------------------------------------------|
| Empirical formula                                                           | C <sub>18</sub> H <sub>12</sub> NBr | C <sub>18</sub> H <sub>12</sub> NBr | C <sub>18</sub> H <sub>11</sub> NBr <sub>2</sub> | C <sub>18</sub> H <sub>11</sub> NBr <sub>2</sub> |
| Formula weight (g mol <sup>-1</sup> )                                       | 322.2                               | 322.2                               | 401.1                                            | 401.1                                            |
| Crystal color                                                               | colorless                           | colorless                           | colorless                                        | colorless                                        |
| Wavelength (Å)                                                              | 0.71073                             | 0.71073                             | 0.71073                                          | 0.71073                                          |
| Space Group                                                                 | P 2 <sub>1</sub> /c                 | P 2 <sub>1</sub> /c                 | P bcn                                            | P 2 <sub>1</sub> /c                              |
| <i>a</i> (Å)                                                                | 10.438(2)                           | 8.5846(15)                          | 6.5819(8)                                        | 4.1487(7)                                        |
| <i>b</i> (Å)                                                                | 15.526(4)                           | 17.271(3)                           | 20.537(2)                                        | 16.589(3)                                        |
| <i>c</i> (Å)                                                                | 17.317(4)                           | 19.703(3)                           | 11.4331(13)                                      | 21.702(4)                                        |
| $\alpha$ (deg)                                                              | 90                                  | 90                                  | 90                                               | 90                                               |
| $\beta$ (deg)                                                               | 92.220(7)                           | 98.009(5)                           | 90                                               | 94.621(5)                                        |
| $\gamma$ (deg)                                                              | 90                                  | 90                                  | 90                                               | 90                                               |
| <i>V</i> (Å <sup>3</sup> )                                                  | 2804.1(11)                          | 2892.8(8)                           | 1545.4(3)                                        | 1488.7(4)                                        |
| <i>Z</i>                                                                    | 8                                   | 8                                   | 4                                                | 4                                                |
| Density (g cm <sup>-3</sup> )                                               | 1.526                               | 1.480                               | 1.724                                            | 1.790                                            |
| $\mu$ (mm <sup>-1</sup> )                                                   | 2.920                               | 2.830                               | 5.237                                            | 5.436                                            |
| <i>F</i> (000)                                                              | 1296                                | 1296                                | 784                                              | 784                                              |
| <i>h</i> <sub>max</sub> , <i>k</i> <sub>max</sub> , <i>l</i> <sub>max</sub> | 14, 15, 23                          | 11, 16, 26                          | 11, 32, 19                                       | 6, 18, 32                                        |
| <i>Theta</i> <sub>max</sub>                                                 | 29.858                              | 28.261                              | 37.116                                           | 33.059                                           |



## Photophysical property investigations

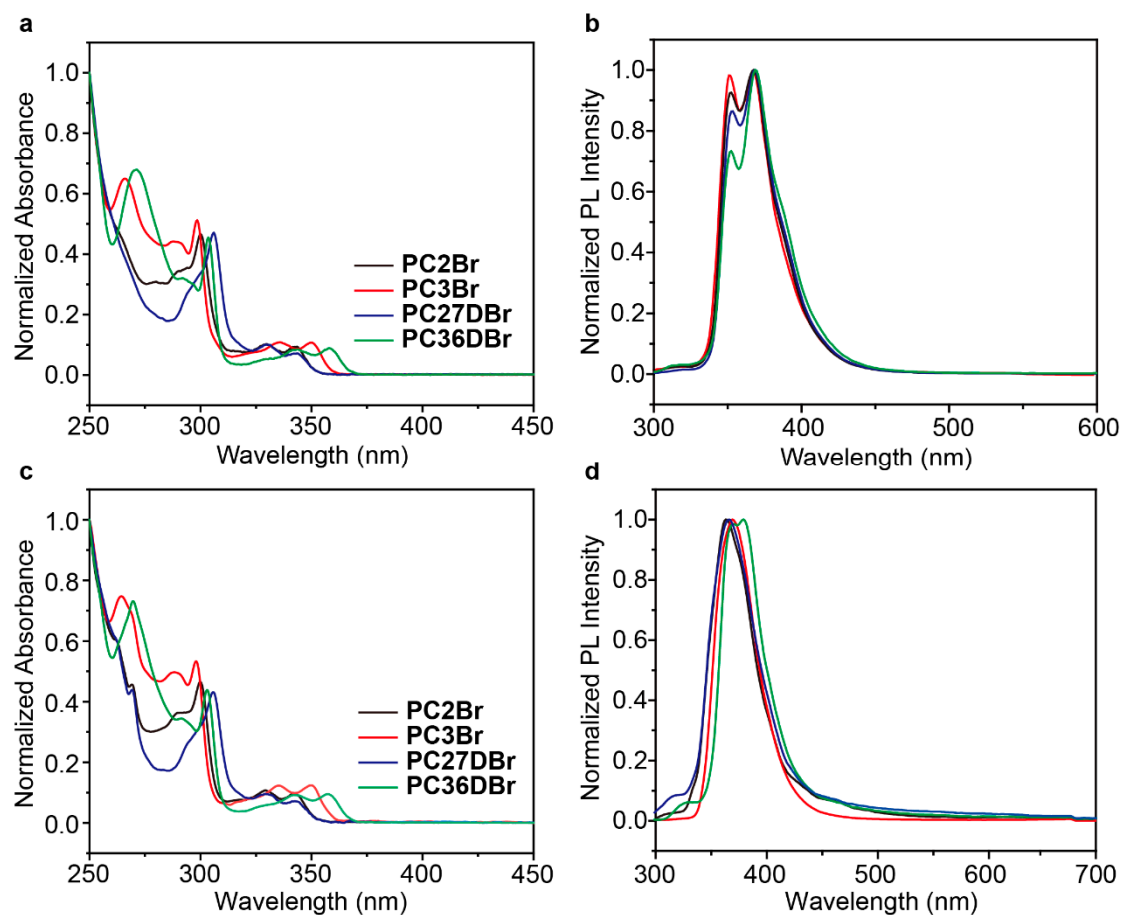

**Figure S14.** UV-Vis absorption spectra and SSPL spectra of **PC2Br**, **PC3Br**, **PC27DBr** and **PC36DBr** in (a~b) CH<sub>2</sub>Cl<sub>2</sub> dilute solution ( $\sim 10^{-5}$  mol L<sup>-1</sup>) and (c~d) thin films, excited by 295 nm at room temperature.



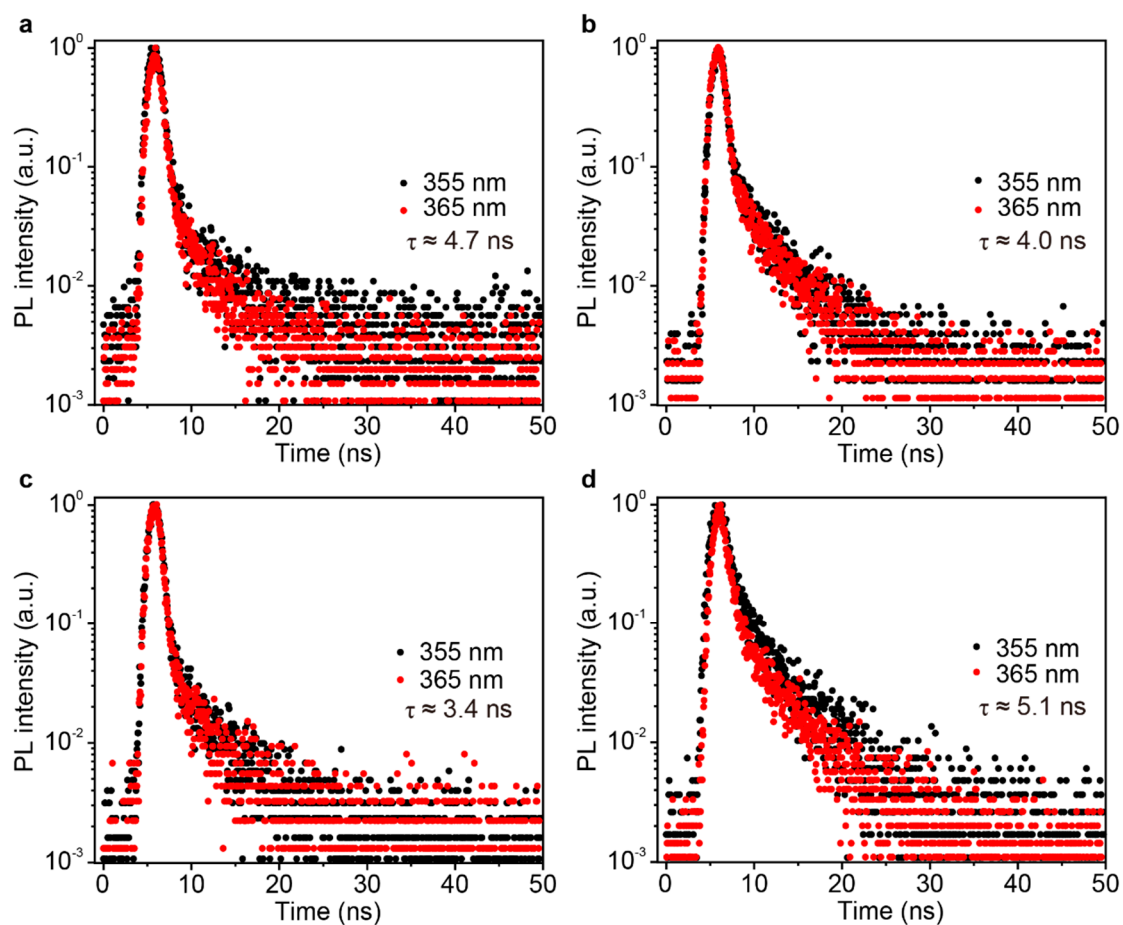

**Figure S15.** Fluorescence decay curves of (a) **PC2Br**, (b) **PC3Br**, (c) **PC27DBr** and (d) **PC36DBr** in dilute  $\text{CH}_2\text{Cl}_2$  solutions ( $10^{-5} \text{ mol L}^{-1}$ ) excited by 295 nm irradiation at room temperature.



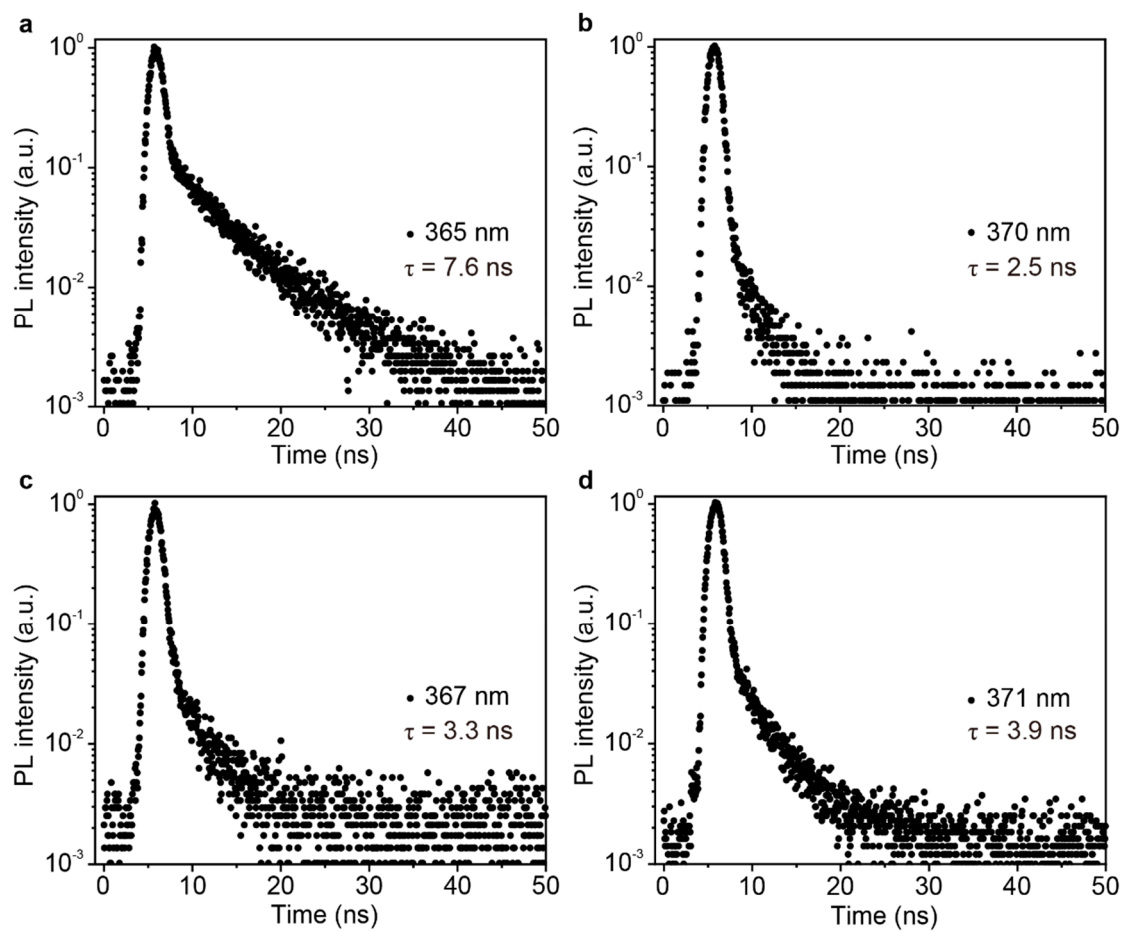

**Figure S16.** Fluorescence decay curves of (a) **PC2Br**, (b) **PC3Br**, (c) **PC27DBr** and (d) **PC36DBr** in thin films excited by 295 nm irradiation at room temperature.



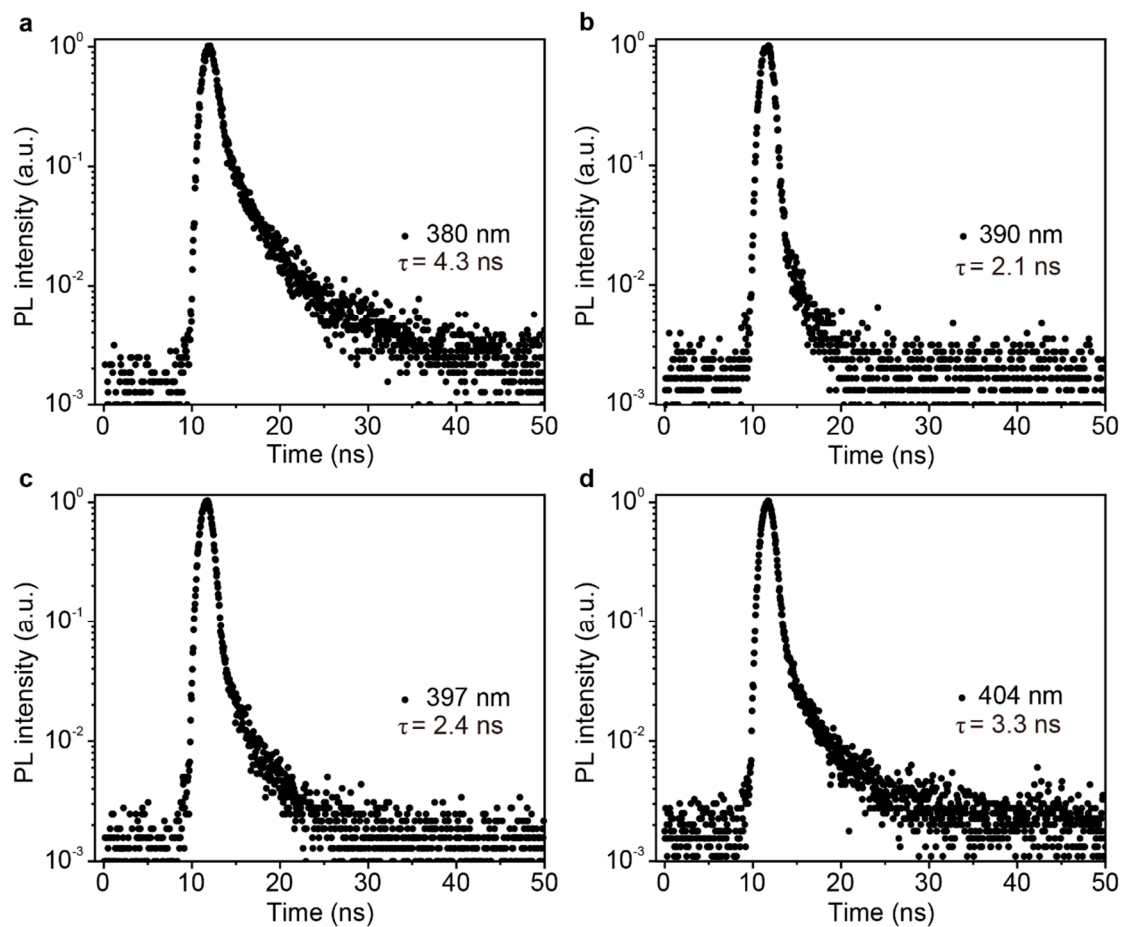

**Figure S17.** Fluorescence decay curves of (a) PC2Br, (b) PC3Br, (c) PC27DBr and (d) PC36DBr crystals excited by 295 nm irradiation at room temperature.



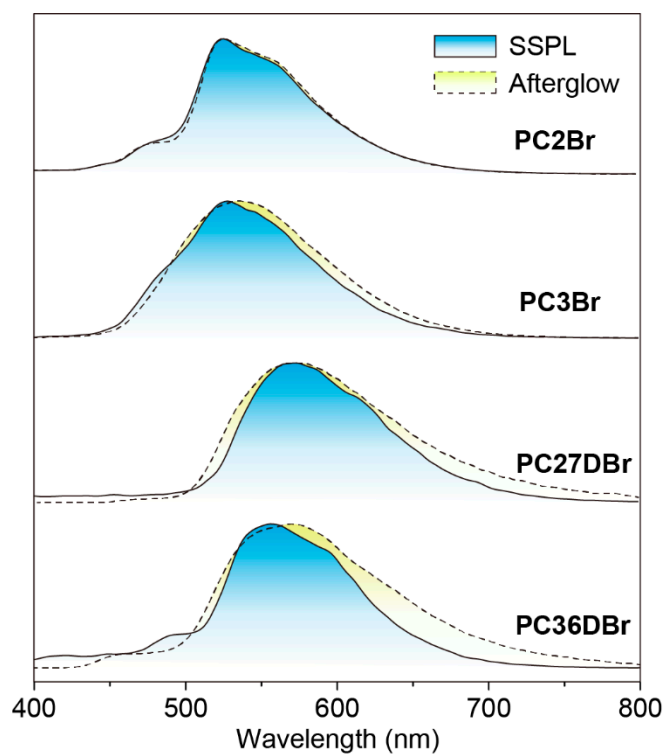

**Figure S18.** Steady-state and organic afterglow emission spectra of **PC2Br**, **PC3Br**, **PC27DBr** and **PC36DBr** crystals excited at 395 nm with a 400 nm filter at room temperature.



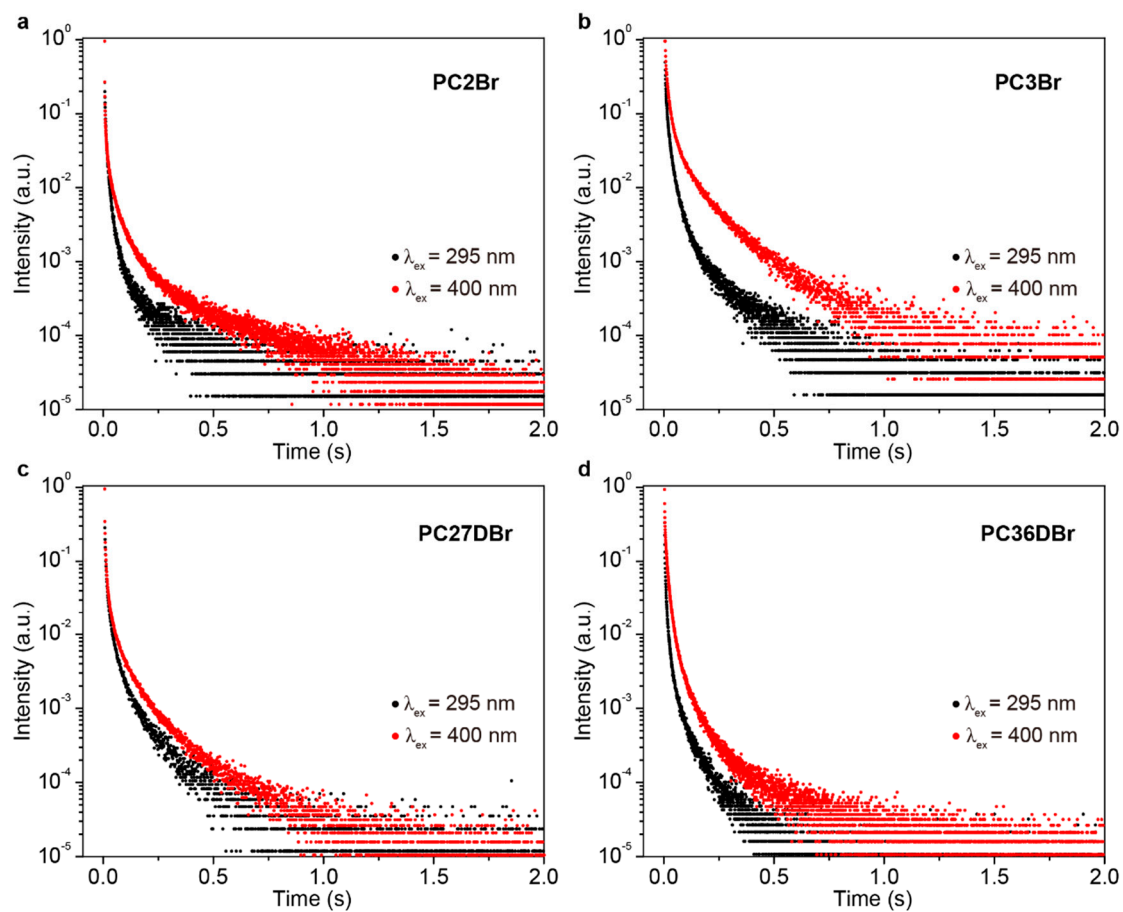

**Figure S19.** Organic afterglow decay curves of (a) **PC2Br**, (b) **PC3Br**, (c) **PC27DBr** and (d) **PC36DBr** crystals excited at 295 nm and 400 nm at room temperature.



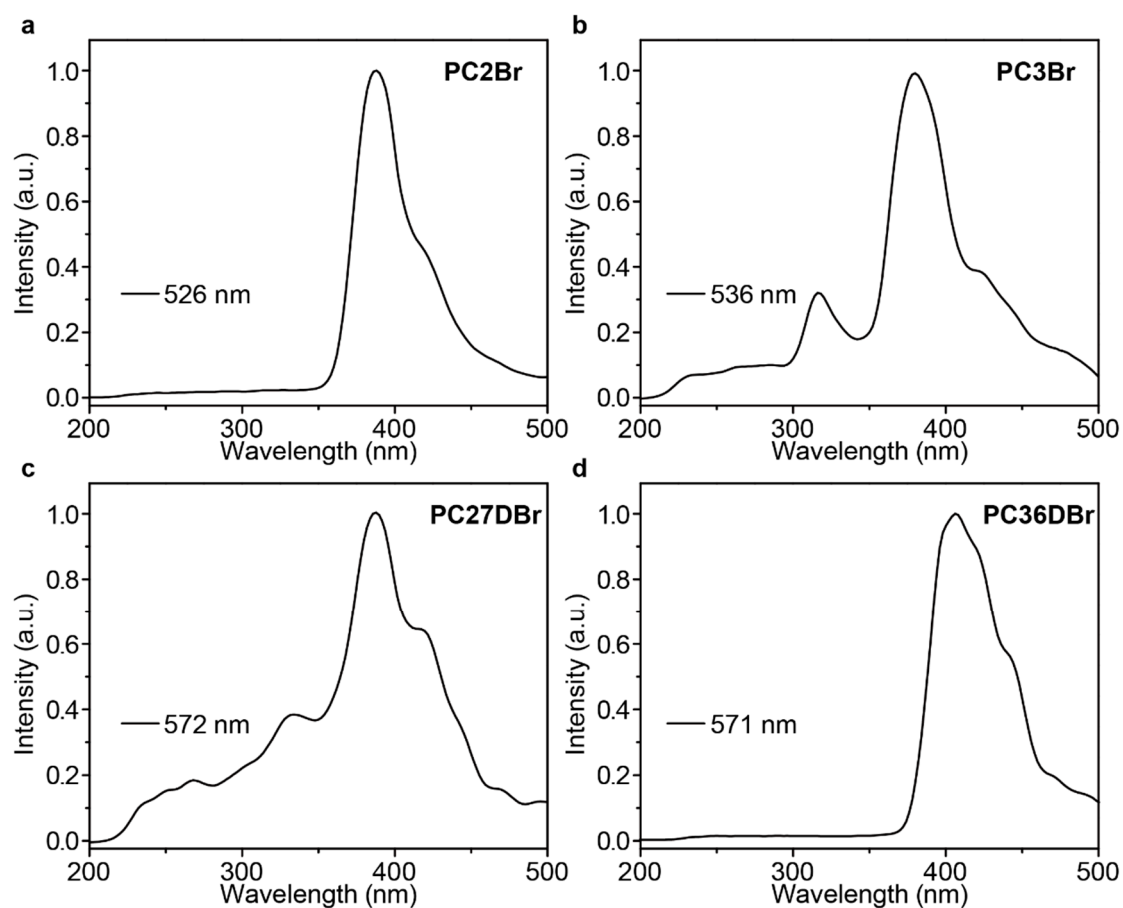

**Figure S20.** Excitation spectra for organic afterglow peaks of (a) **PC2Br**, (b) **PC3Br**, (c) **PC27DBr** and (d) **PC36DBr** crystals at room temperature.

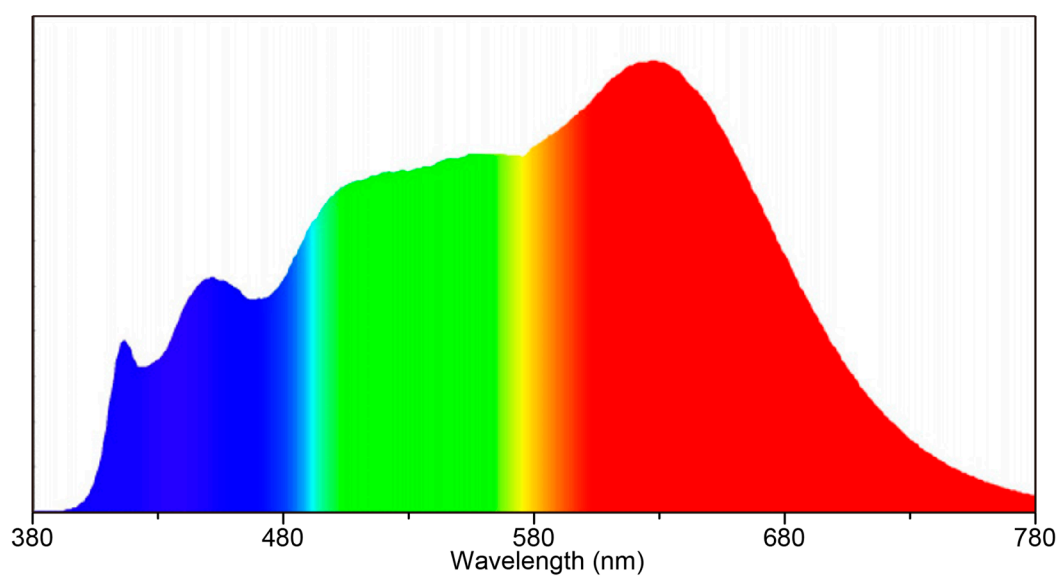

**Figure S21.** Steady-state emission spectrum of white LED at room temperature.



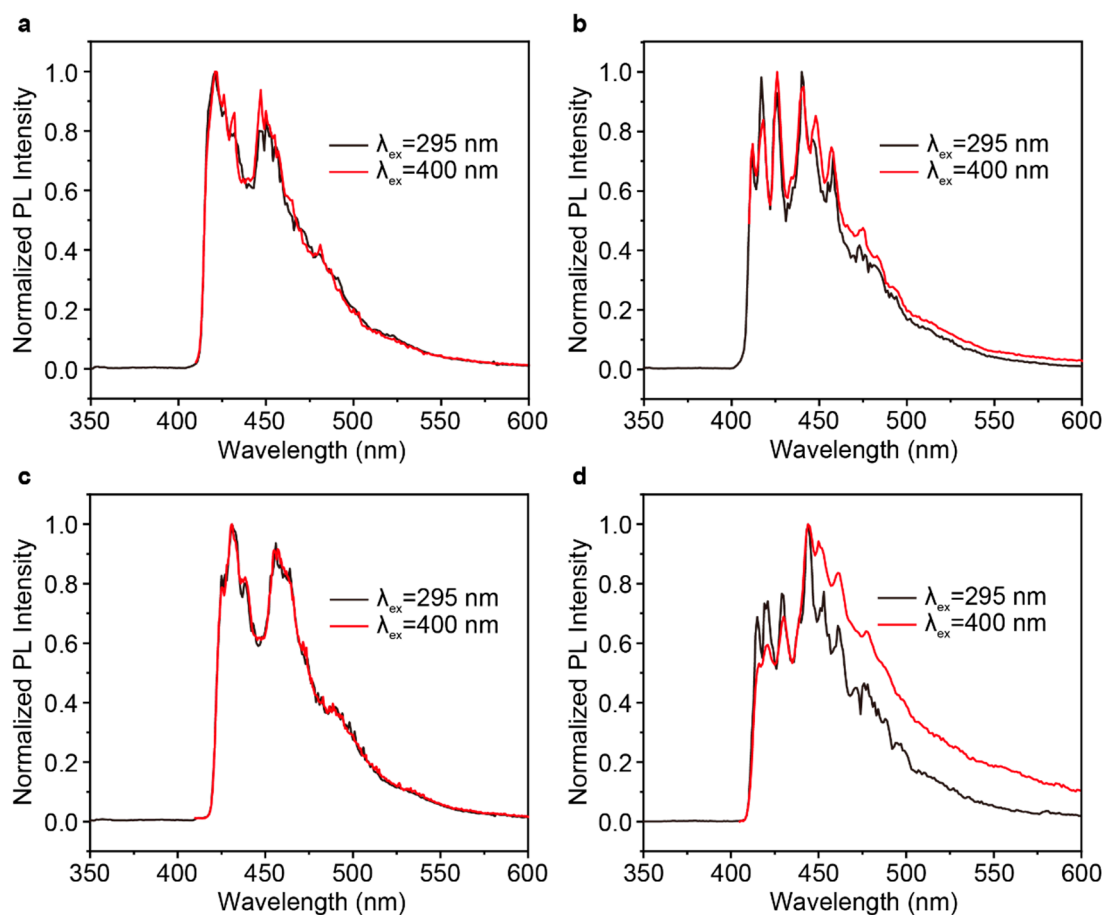

**Figure S22.** UV-light (295 nm, black line) and visible-light (400 nm, red line) excited phosphorescence spectra of (a) **PC2Br**, (b) **PC3Br**, (c) **PC27DBr** and (d) **PC36DBr** in 2-methyltetrahydrofuran dilute ( $\sim 10^{-5}$  mol L $^{-1}$ ) solution at 77 K with a delay time of 10 ms.



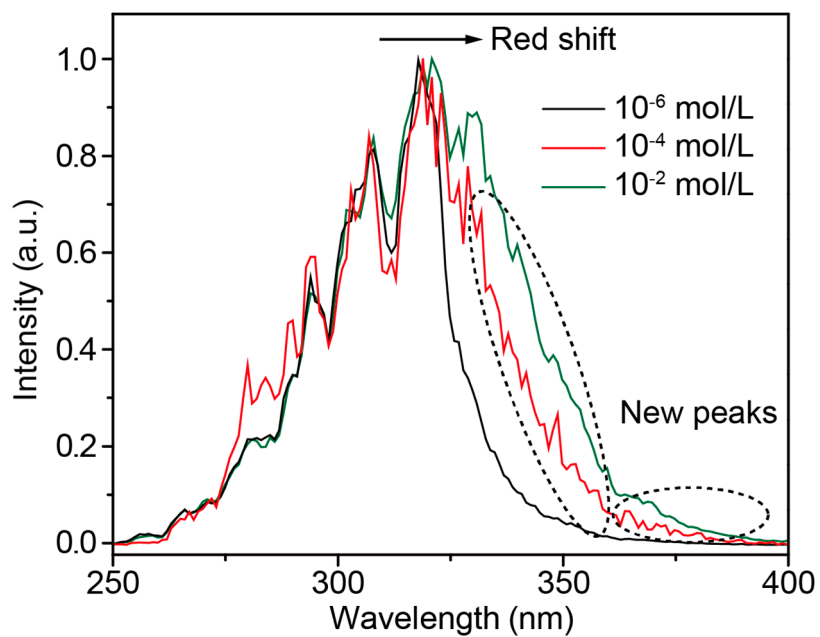

**Figure S23.** Phosphorescence excitation spectra of **PC2Br** in 2-methyltetrahydrofuran solution with increasing concentration at 77 K, recorded with a delay time of 10 ms.



## Probing the formation of triplet excited states

The presence of triplet states in the solutions of Br-substituted 9-phenyl-9H-carbazole (**PhCz**) derivatives was assessed through the photodegradation of 1,3-Diphenylisobenzofuran (**DPBF**). Essentially, the energy transfer from the triplet excited state of the compound to the ground state of molecular oxygen ( $^3\text{O}_2$ ) results in the formation of an electronically excited state of molecular oxygen, namely singlet oxygen ( $^1\text{O}_2$ ), upon photoexcitation. Thus, **DPBF** serves as a chemical trap to detect generated  $^1\text{O}_2$ , and this trapping process can be quantitatively monitored using a UV-vis spectrophotometer. Specifically, in the presence of triplet states and generated  $^1\text{O}_2$ , the characteristic absorption peaks of **DPBF** (424 nm) gradually diminish in intensity and eventually disappear.

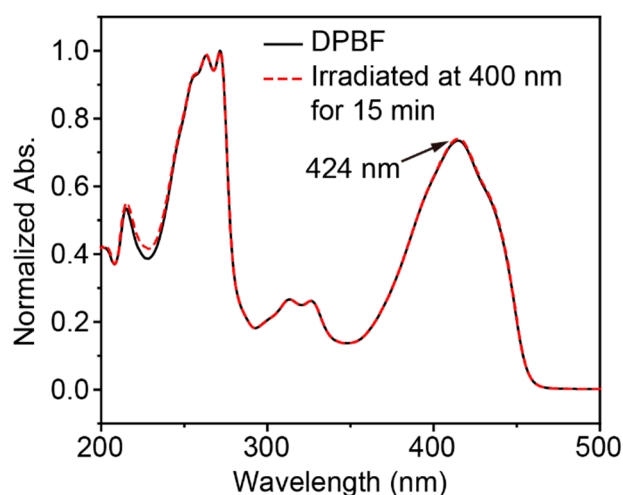

**Figure S24.** Absorption spectra of **DPBF** (50  $\mu\text{M}$ ) in THF under 400 nm irradiation for 15 min at room temperature.



## Time-dependent density functional theory (TD-DFT) calculations

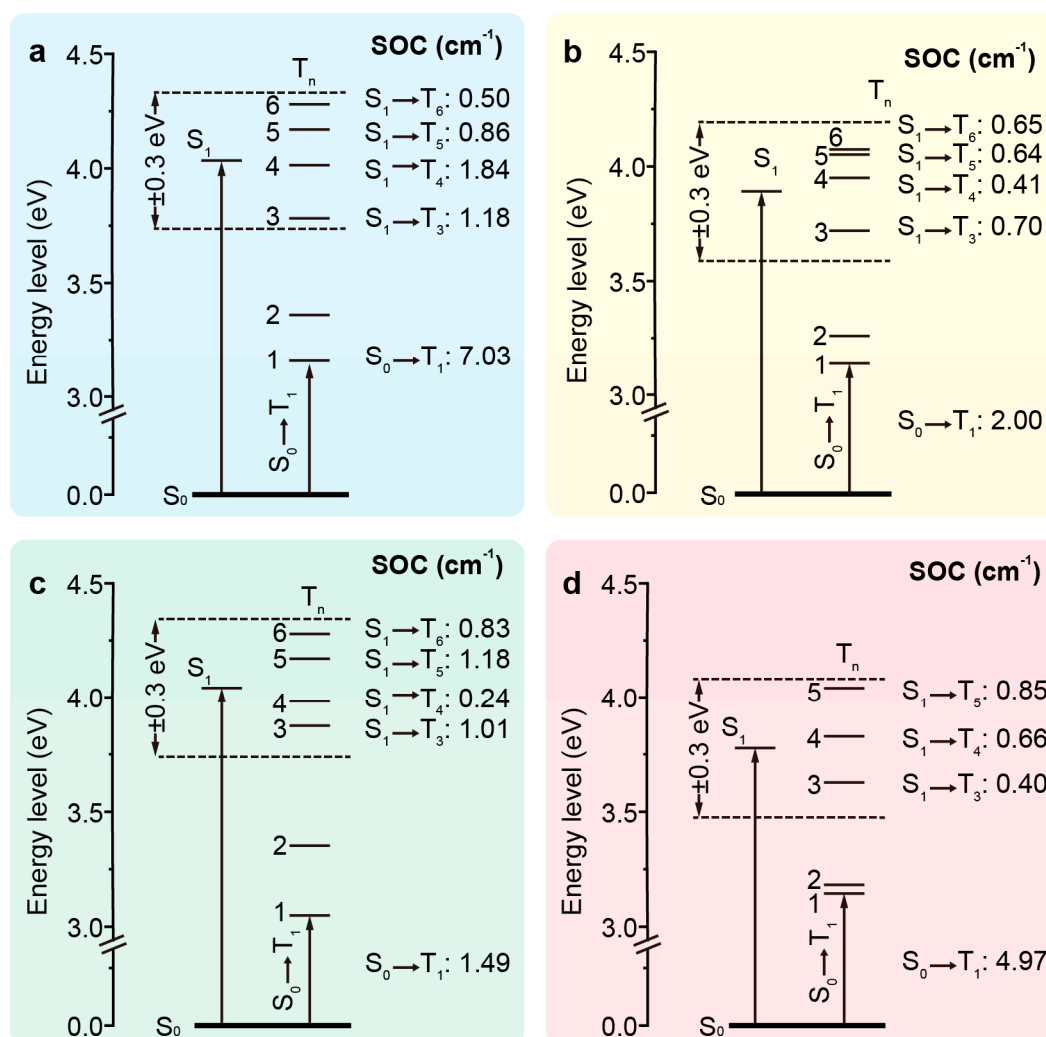

**Figure S25.** Schematic diagrams showing the TD-DFT-calculated energy levels at singlet ( $S_n$ ) and triplet ( $T_n$ ) states and spin-orbit coupling (SOC) values for  $S_1 \rightarrow T_n$  and  $S_0 \rightarrow T_n$  of (a) **PC2Br**, (b) **PC3Br**, (c) **PC27DBr** and (d) **PC36DBr**. Note that only the most possible  $T_n$  with singlet-triplet splitting ( $\Delta E_{ST}$ ) lower than 0.3 eV were illustrated.



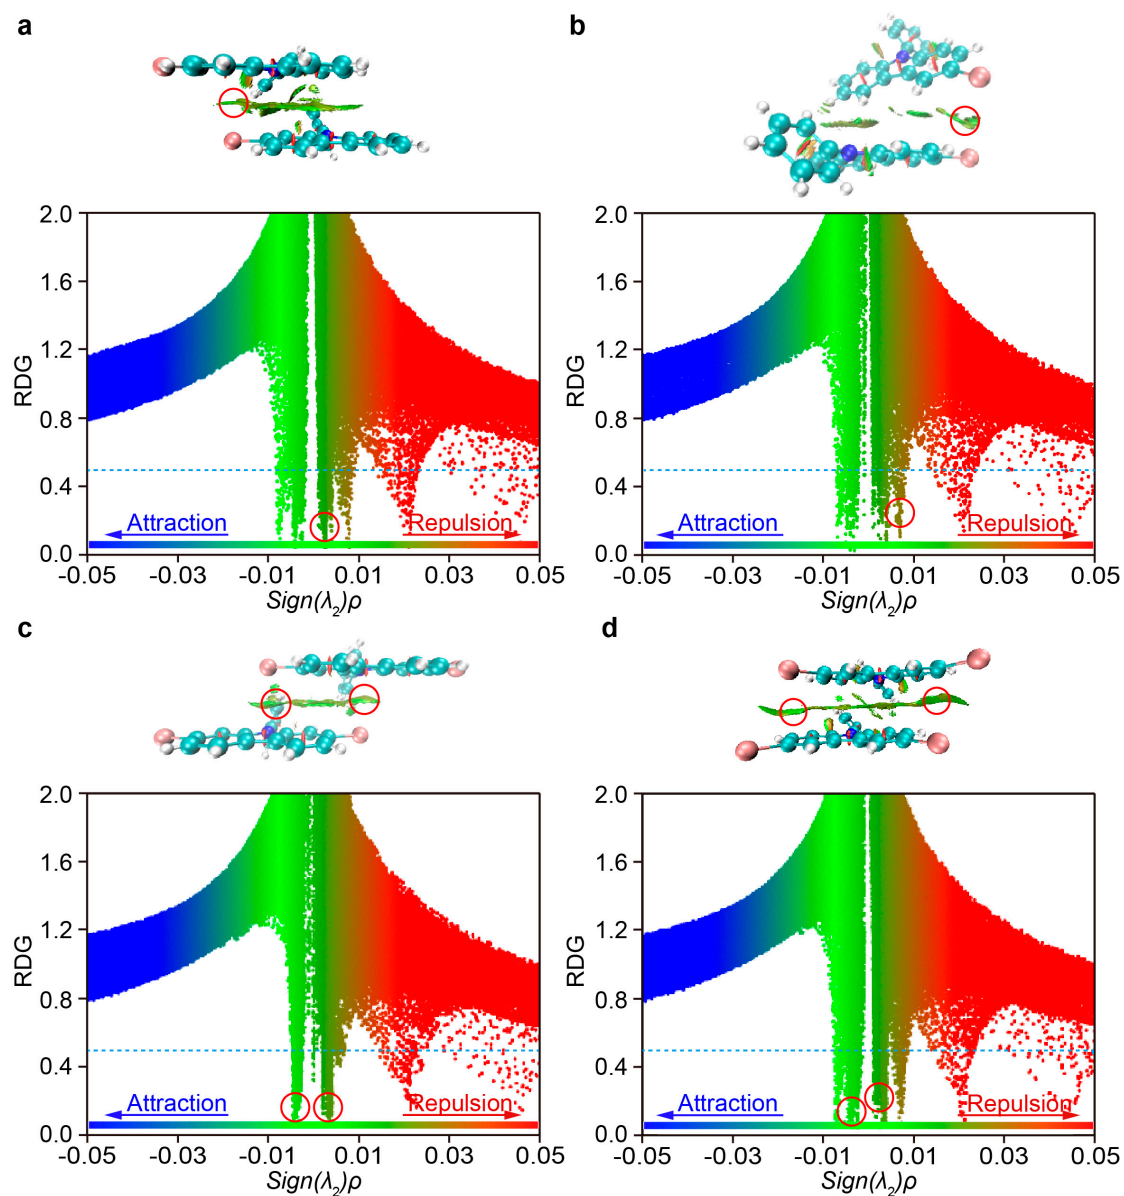

**Figure S26.** Analysis of intermolecular heavy atom effect. Plots of reduced density gradient (RDG) versus  $\text{sign}(\lambda_2)\rho$  with RDG isosurface of the selected dimers in (a) **PC2Br**, (b) **PC3Br**, (c) **PC27DBr** and (d) **PC36DBr** single crystals. Intermolecular heavy atom interactions are highlighted in red circles.
